# Supplementary material for: Fluorescence enhancement through the formation of a single-layer two-dimensional supramolecular organic framework and its application in highly selective recognition of picric acid
Source: Royal Society of Chemistry journal article supplement (doi:10.1039/c6cc03631g), 2016-01-01
Supplement: c6cc03631g1.pdf [file c6cc03631g1.pdf]

## **Electronic Supplementary Information**

Fluorescence enhancement through the formation of a single-layer  
two-dimensional supramolecular organic framework and its application in  
highly selective recognition of picric acid

Ying Zhang, Tian-Guang Zhan, Tian-You Zhou, Qiao-Yan Qi, Xiao-Na Xu  
and Xin Zhao\*

Key Laboratory of Synthetic and Self-Assembly Chemistry for Organic Functional  
Molecules, Shanghai Institute of Organic Chemistry, Chinese Academy of Sciences,  
345 Lingling Road, Shanghai, 200032, China. E-mail: xzhao@sioc.ac.cn

## Section 1: Materials and General Methods

All reagents were purchased from commercial suppliers and used without further purification unless stated otherwise. Compound **3** were synthesized according to the literature.<sup>1</sup>  $^1\text{H}$  and  $^{13}\text{C}$  NMR, NOESY, DOSY and COSY NMR spectra were recorded on a Bruker Avance DMX 400 or a 500 MHz Agilent spectrometer at 25°C. UV-Vis absorption spectra were recorded with a Unico 4802 UV-vis double beam spectrophotometer at 25 °C. Fluorescence emission spectra were recorded with a F-4600 FL spectrophotometer at 25 °C. Dynamic light scattering (DLS) experiments were performed on a Zetasizer Nano ZS90 light-scattering instrument (Malvern, UK) at 25 °C. Synchrotron radiation SAXS experiments were performed on the BL16B beamline of Shanghai Synchrotron Radiation Facility, using a fixed wavelength of 0.124 nm, a sample to detector distance of 2.01 m and an exposure time of 3,600 s.

## Section 2. Synthesis and Characterizations

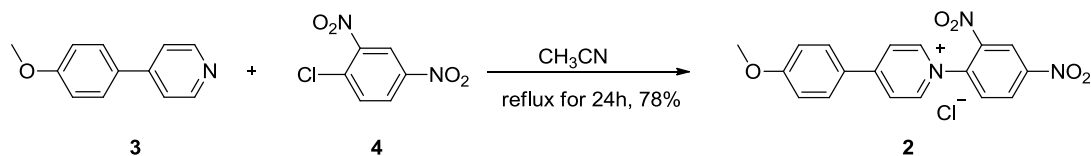

**Compound 2:** Compounds **3** (6.1 g, 33 mmol) and **4** (10 g, 49.5 mmol) were dissolved in anhydrous  $\text{CH}_3\text{CN}$  (150 mL) and refluxed for 24 hours. The resulting mixture was cooled to room temperature and filtered. The filter cake was washed with acetone (100 ml  $\times$  3) and dried to give compound **2** as a yellow solid (10 g, 78%).  $^1\text{H}$  NMR (500 MHz,  $\text{CD}_3\text{OD}$ ):  $\delta$  9.27 (d,  $J = 2.5$  Hz, 1 H), 9.09 (d,  $J = 7.3$  Hz, 2 H), 8.91 (dd,  $J_1 = 8.7$  Hz,  $J_2 = 2.5$  Hz, 1 H), 8.61 (d,  $J = 7.2$  Hz, 2 H), 8.32 (d,  $J = 8.6$  Hz, 1 H), 8.22 (d,  $J = 9.0$  Hz, 2 H), 7.25 (d,  $J = 8.9$  Hz, 2 H), 3.97 (s, 3H).  $^{13}\text{C}$  NMR (125 MHz,  $\text{CD}_3\text{OD}$ ):  $\delta$  164.70, 158.43, 149.59, 144.78, 143.48, 138.66, 131.32, 130.54, 129.64, 124.97, 122.71, 121.77, 115.34, 54.99. MS (ESI):  $m/z$  352.2  $[\text{M}-\text{Cl}]^+$ . HRMS (ESI) Calcd. for  $\text{C}_{18}\text{H}_{14}\text{N}_3\text{O}_5$   $[\text{M}-\text{Cl}]^+$ : 352.0928. Found: 352.0930.

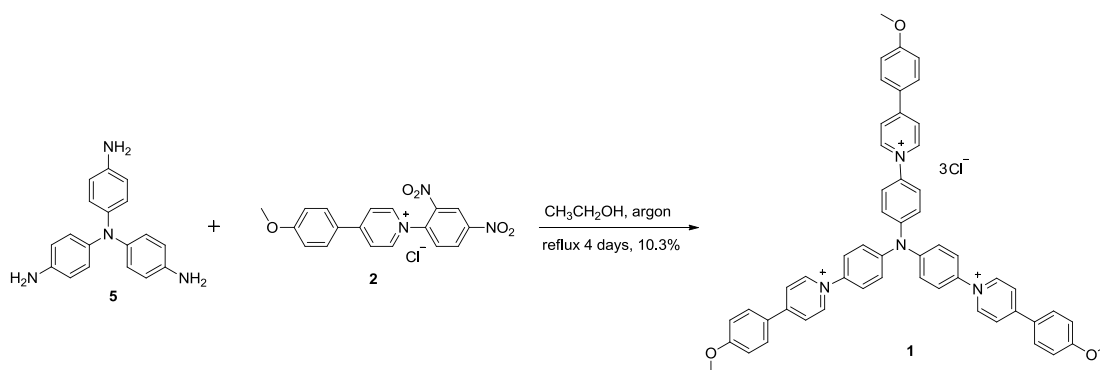

**Compound 1:** Compounds **2** (0.8 g, 2.1 mmol) and **5** (0.1 g, 0.34 mmol) were dissolved in anhydrous ethanol (10 mL) and sealed in a schlenk tube under argon atmosphere. The mixture was refluxed for 4 days. After being cooled to room temperature, the solvent was evaporated and the resulting residue was purified by flash column chromatography (acetone, acetone/methanol = 1:1, then to methanol/H<sub>2</sub>O/ NH<sub>4</sub>Cl (saturated aq.) = 6:3:1 gradually). An orange solid was obtained and it was further dissolved in a small amount of water and then filtered (so as to remove excess NH<sub>4</sub>Cl), The filter cake was dried to afford compound **1** as a red solid (32 mg, 10.3%). <sup>1</sup>H NMR (400 MHz, CD<sub>3</sub>OD): δ 9.00 (d, *J* = 8.0 Hz, 6 H), 8.46 (d, *J* = 8.0 Hz, 6 H), 8.10 (d, *J* = 8.1 Hz, 6 H), 7.79 (d, *J* = 8.0 Hz, 6 H), 7.55 (d, *J* = 8.1 Hz, 6 H), 7.25 (d, *J* = 8.0 Hz, 6H), 3.95 (s, 9 H). <sup>13</sup>C NMR (125 MHz, CD<sub>3</sub>OD): δ 164.15, 156.43, 148.76, 143.54, 138.35, 130.04, 125.67, 125.28, 124.39, 123.19, 115.21, 54.91. MS (ESI): *m/z* 266.1 [M-3Cl]<sup>3+</sup>. HRMS (ESI) Calcd. for C<sub>54</sub>H<sub>45</sub>N<sub>4</sub>O<sub>3</sub> [M-3Cl]<sup>3+</sup>: 265.7825. Found: 265.7826.

## Reference

- 1 Y. Zhang, T.-Y. Zhou, K.-D. Zhang, J.-L. Dai, Y.-Y. Zhu and X. Zhao, *Chem. Asian J.*, 2014, **9**, 1530.2

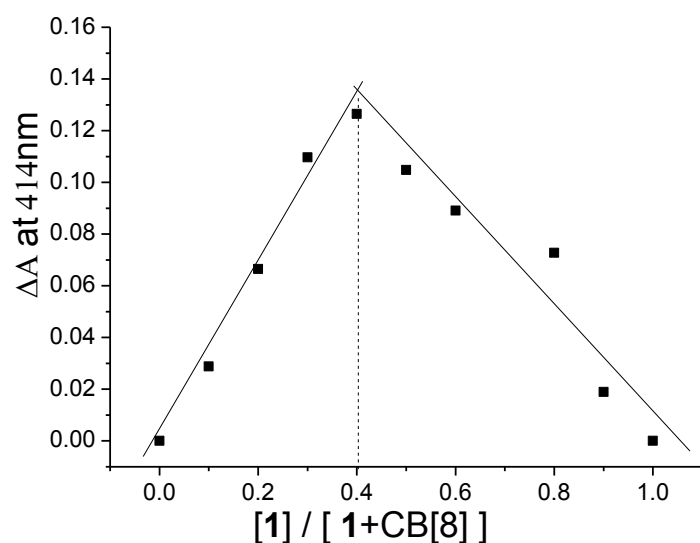

**Figure S1** Job's plot obtained by recording the absorbance at 414 nm for the solution of **1** and CB[8] in a binary solvent of H<sub>2</sub>O/CH<sub>3</sub>OH(17:3) at 25 °C, ( $[1] + [\text{CB}[8]] = 2.0 \times 10^{-5} \text{ M}$ ), confirming the 2:3 stoichiometry of their complex.

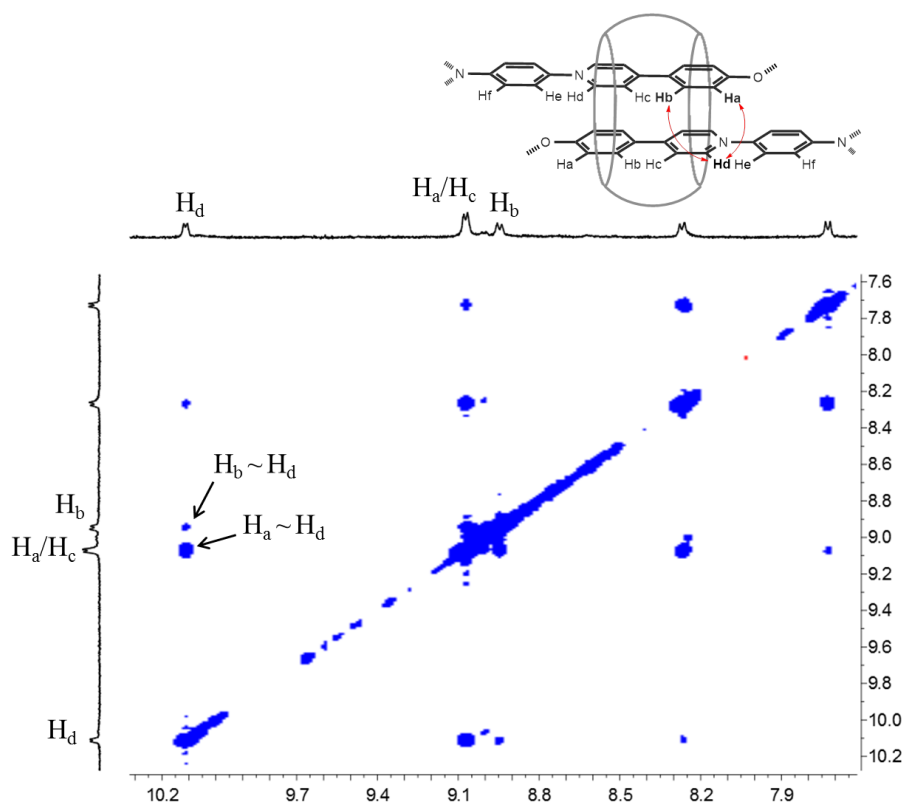

**Figure S2** 2D <sup>1</sup>H NMR NOESY spectrum (400 MHz) of (**1** + CB[8]) (2:3,  $[1] = 0.5 \text{ mM}$ ) in a binary solvent of D<sub>2</sub>O/CD<sub>3</sub>OD (17:3, v/v) at 25 °C.

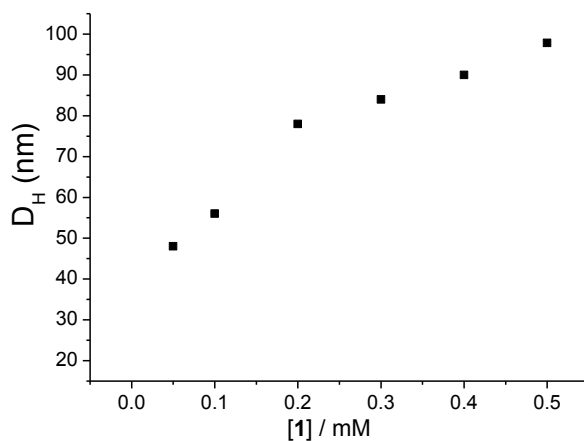

**Figure S3** The plot of  $D_h$  vs. the concentration of (1 + CB[8]) (2:3) in a binary solvent of  $H_2O/CH_3OH$  (17:3, v/v) at 25 °C.

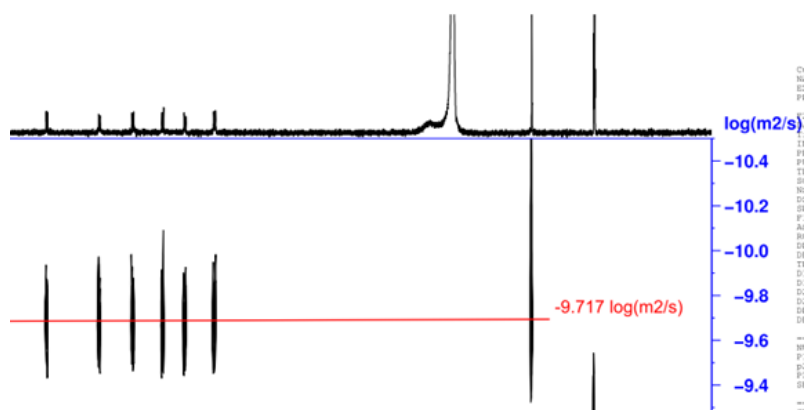

**Figure S4** DOSY-NMR spectrum (500 MHz) of **1** (1.0 mM) in  $D_2O/CD_3OD$  (17:3, v/v). The ordinate represents the log value of the diffusion constant.

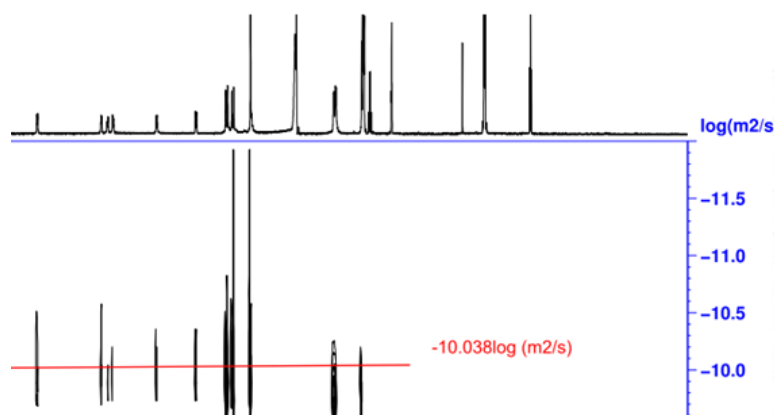

**Figure S5** DOSY-NMR spectrum (500 MHz) of (1 + CB[8]) (2:3, [1] = 1.0 mM) in  $D_2O/CD_3OD$  (17:3, v/v). The ordinate represents the log value of the diffusion constant.

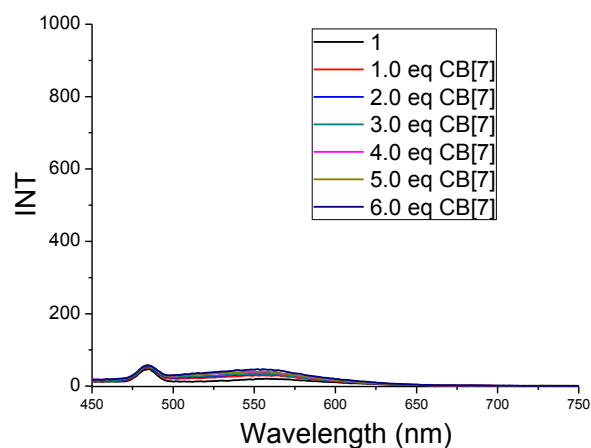

**Figure S6** Fluorescence titration spectra of **1** (0.3  $\mu\text{M}$ ) with CB[7] in water at 25  $^{\circ}\text{C}$ .  $\lambda_{\text{ex}} = 414 \text{ nm}$ .

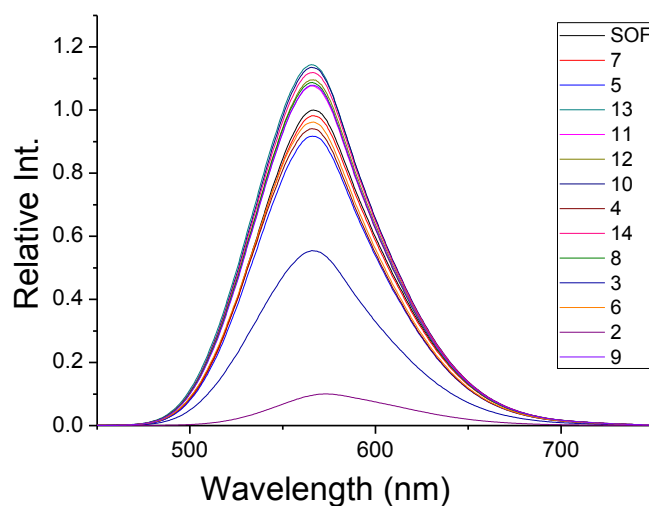

**Figure S7** Fluorescence spectra of the 2D SOF in the presence of different nitroaromatics in water at 25  $^{\circ}\text{C}$ .  $\lambda_{\text{ex}} = 414 \text{ nm}$ .

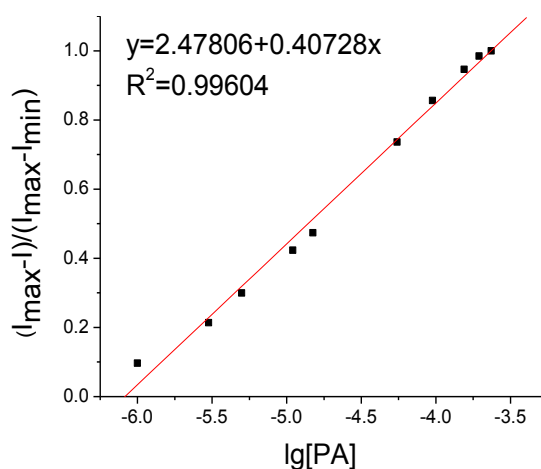

**Figure S8**  $(I_{\text{max}} - I)/(I_{\text{max}} - I_{\text{min}})$  vs  $\lg[\text{PA}]$  plot for the fluorescence titration. The intercept at X-axis shows the lowest concentration of PA which can be detected.

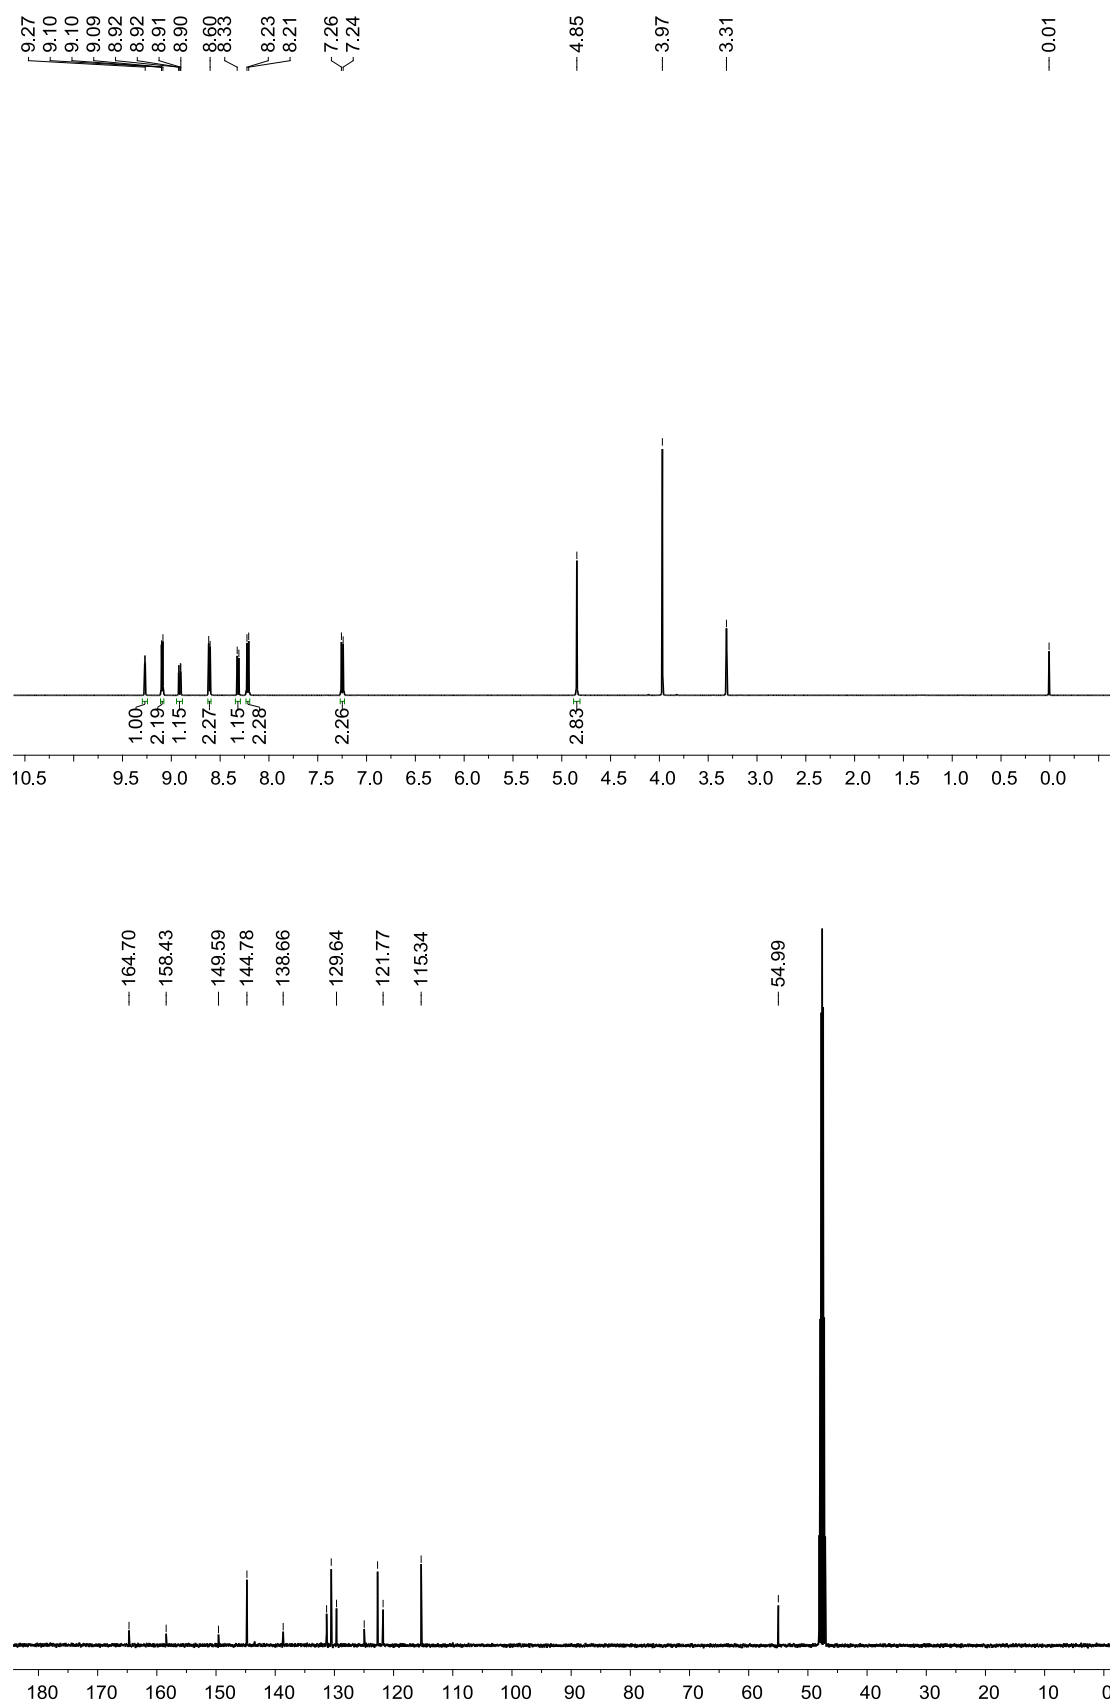

**Figure S9** <sup>1</sup>H NMR (500MHz, CD<sub>3</sub>OD) and <sup>13</sup>C NMR (125 MHz, CD<sub>3</sub>OD) spectra of compound **2**.

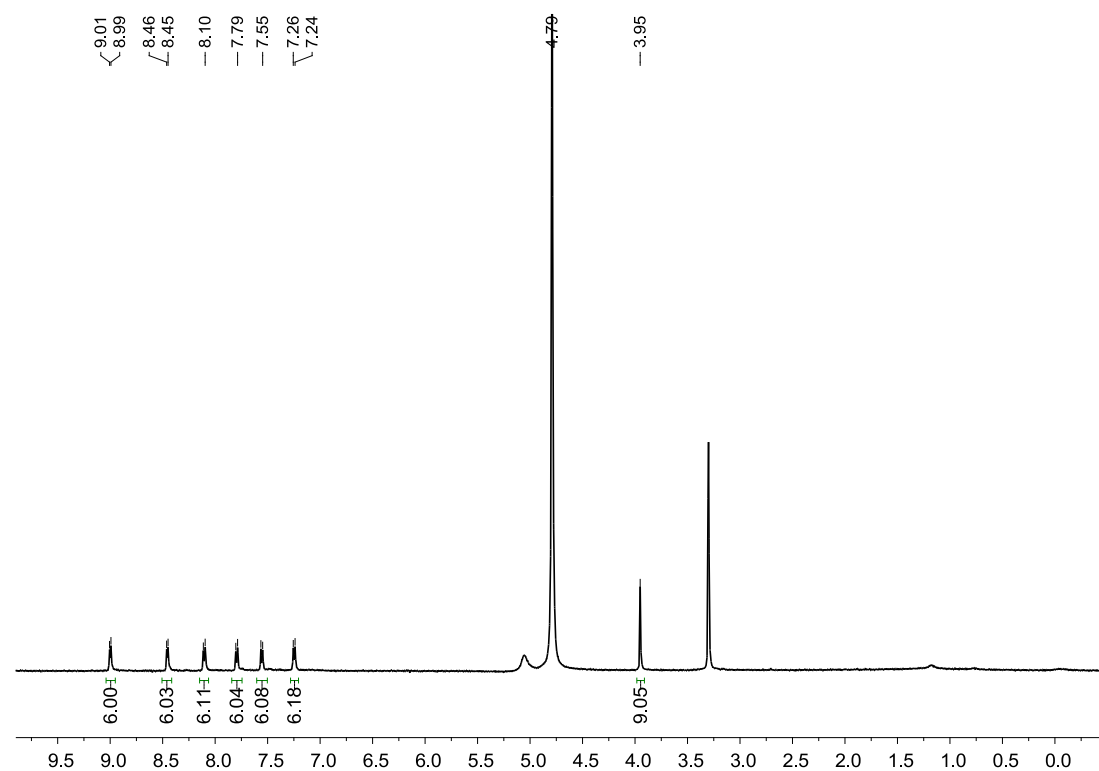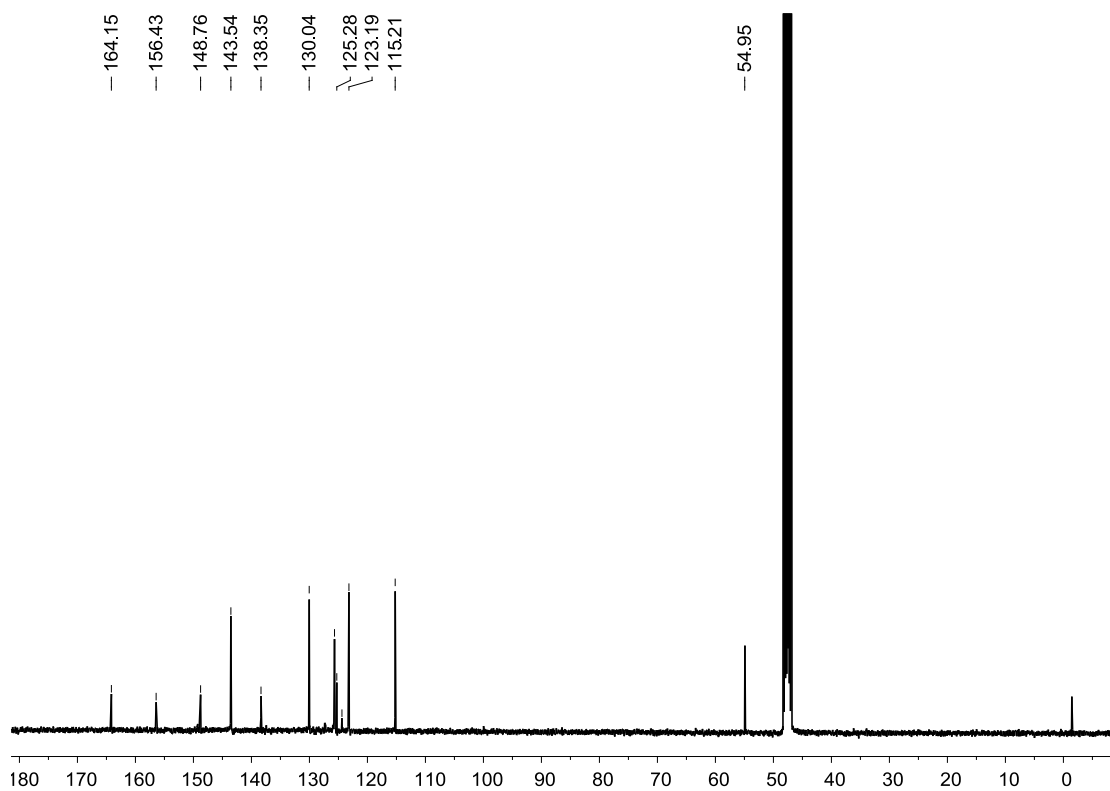

**Figure S10** <sup>1</sup>H NMR (400MHz, CD<sub>3</sub>OD) and <sup>13</sup>C NMR (125MHz, CD<sub>3</sub>OD) spectra of compound **1**.



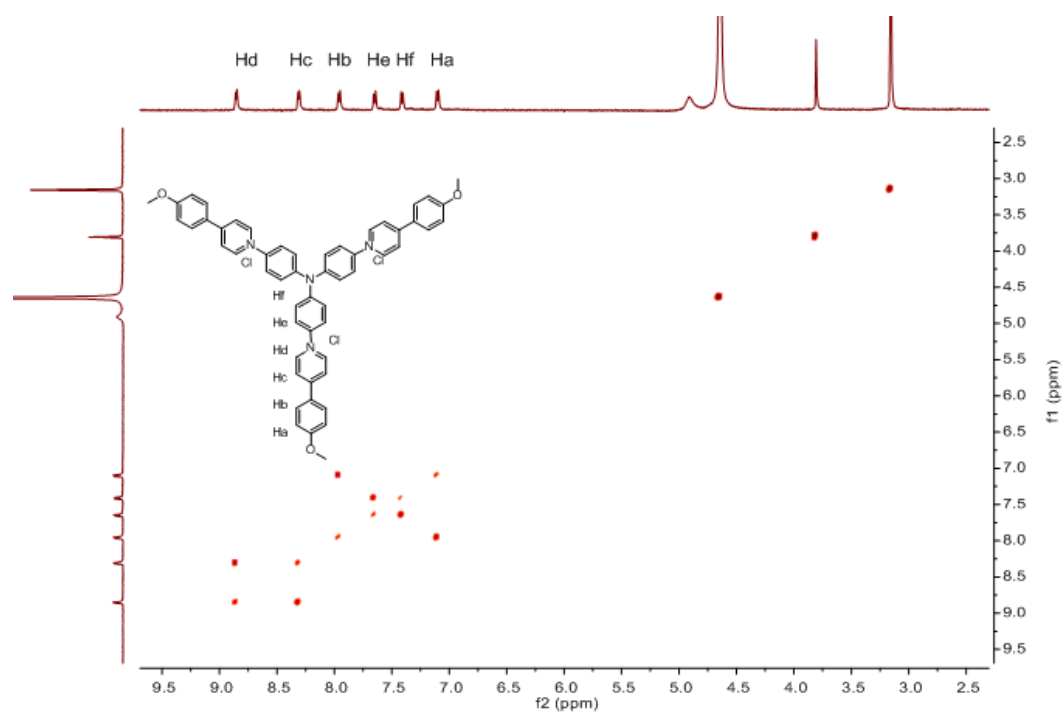

**Figure S11** 2D  $^1\text{H}$  NMR COSY spectrum (500 MHz,  $\text{CD}_3\text{OD}$ ) of **1** at 25  $^\circ\text{C}$ .
